# Supplementary material for: Development of a single-cell array for large-scale DNA fluorescence in situ hybridization
Source: Royal Society of Chemistry journal article supplement (doi:10.1039/c2lc40364a), 2012-12-04
Supplement: c2lc40364a.pdf [file c2lc40364a.pdf]

# Development of single-cell array for large-scale DNA fluorescence *in situ* hybridization

Yingru Liu, Brett Kirkland, Jamie Shirley, Zhibin Wang, Peipei Zhang, Jacquelyn Stembridge, Wilson Wong, Shin-ichiro Takebayashi, David M. Gilbert, Steven Lenhart, Jingjiao Guan

## Electronic Supplementary Information

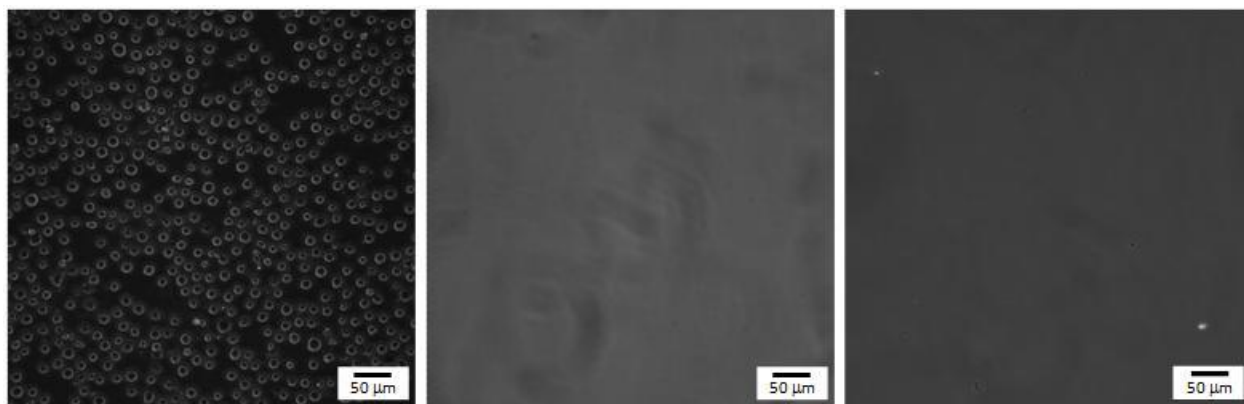

**Fig. S1.** Phase-contrast micrographs of (a) a monolayer of K562 cells immobilized on an APTES-coated slide, (b) a slide coated with PEG silane, and (c) a slide coated with OTS after being incubated with K562 cells. No cells were immobilized on the latter two slides.

Table S1. Evaluation of the quality of single-cell arrays produced at different seeding times and seeding cell densities (numbers of cells per adhesive APTES islands). Each experimental condition was repeated three times, and four micrographs were evaluated for each repetition. As a result, 12 micrographs were analyzed for each condition. Each micrograph contained 754 APTES islands, and the total number of islands in 12 micrographs was therefore 9048. Islands occupied by one, two, and three cells and the number of cells on background were counted in all micrographs at each condition. Numbers of empty islands were calculated by subtraction of the numbers of occupied islands from the total number of the islands. Average single-cell occupancies (SCOs) and standard deviations were calculated from the 12 micrographs.

| Seeding time (min) | Seeding cell density | Number of islands occupied by |         |         | Number of cells on background | Number of empty islands | Average SCO (%) | Standard deviation (%) |
|--------------------|----------------------|-------------------------------|---------|---------|-------------------------------|-------------------------|-----------------|------------------------|
|                    |                      | 1 cell                        | 2 cells | 3 cells |                               |                         |                 |                        |
| 15                 | 0.5                  | 1647                          | 86      | 5       | 7                             | 7310                    | 18              | 4                      |
|                    | 1                    | 5161                          | 636     | 47      | 68                            | 3204                    | 57              | 4                      |
|                    | 2                    | 5682                          | 310     | 13      | 26                            | 3043                    | 63              | 5                      |
| 30                 | 0.5                  | 3496                          | 256     | 18      | 96                            | 5278                    | 39              | 14                     |
|                    | 1                    | 7127                          | 506     | 21      | 52                            | 1394                    | 79              | 6                      |
|                    | 2                    | 7177                          | 851     | 41      | 47                            | 979                     | 79              | 4                      |
| 45                 | 0.5                  | 4203                          | 135     | 8       | 37                            | 4702                    | 46              | 11                     |
|                    | 1                    | 7281                          | 1212    | 104     | 63                            | 451                     | 80              | 5                      |
|                    | 2                    | 7500                          | 750     | 50      | 54                            | 748                     | 83              | 6                      |
| 60                 | 0.5                  | 4227                          | 616     | 36      | 144                           | 4169                    | 47              | 12                     |
|                    | 1                    | 7766                          | 661     | 30      | 27                            | 591                     | 86              | 3                      |
|                    | 2                    | 7442                          | 799     | 34      | 49                            | 773                     | 82              | 6                      |
| 90                 | 0.5                  | 4222                          | 499     | 45      | 123                           | 4282                    | 47              | 12                     |
|                    | 1                    | 6619                          | 1313    | 106     | 122                           | 1010                    | 73              | 5                      |
|                    | 2                    | 7486                          | 1042    | 67      | 66                            | 453                     | 83              | 5                      |
| 120                | 0.5                  | 3924                          | 436     | 28      | 64                            | 4660                    | 43              | 6                      |
|                    | 1                    | 6208                          | 1994    | 282     | 121                           | 564                     | 69              | 6                      |
|                    | 2                    | 7338                          | 830     | 88      | 33                            | 792                     | 81              | 8                      |
